# Supplementary material for: Design and constructions of three novel metal–organic frameworks based on pillared-layer motifs
Source: Royal Society of Chemistry journal article supplement (doi:10.1039/b909053c), 2009-10-03
Supplement: b909053c.pdf [file b909053c.pdf]

*Electronic Supplementary Information for:*

**Design and constructions of three novel metal–organic frameworks based on the pillared-layer motifs†**

Yan-Yan Xu, Yan-Yan Xing, Xian-Ying Duan, Li-Zhi Li, Hui-Zhen Zhu and  
Qing-Jin Meng\*

State Key Laboratory of Coordination Chemistry, Nanjing National Laboratory of  
Microstructures, School of Chemistry and Chemical Engineering, Nanjing University,  
Nanjing 210093, P.R. China.

Email: [mengqj@nju.edu.cn](mailto:mengqj@nju.edu.cn);

**Table S1.** Selected Distances (Å) and Angles (deg) of Hydrogen Bonding for Compound **1-3**<sup>c</sup>

| <b>D – H</b>     | <b>d(D – H)</b> | <b>d(H ... A)</b> | <b>∠DHA</b> | <b>d(D ... A)</b> | <b>A</b> |
|------------------|-----------------|-------------------|-------------|-------------------|----------|
| <b>Complex 1</b> |                 |                   |             |                   |          |
| O(5)–H(5D)       | 0.85            | 2.23              | 123         | 2.780(3)          | O(2)#1   |
| O(7)–H(7D)       | 0.85            | 2.18              | 115         | 2.649(5)          | O(5)#2   |
| O(6)–H(6A)       | 0.85            | 2.17              | 149         | 2.933(5)          | O(7)#3   |
| O(6)–H(6C)       | 0.85            | 2.06              | 149         | 2.820(3)          | O(3)#4   |
| O(8)–H(8F)       | 0.85            | 2.18              | 138         | 2.865(4)          | O(1)#5   |
| O(8)–H(8C)       | 0.85            | 2.12              | 123         | 2.689(5)          | O(5)#6   |
| <b>Complex 2</b> |                 |                   |             |                   |          |
| O(1W)–H(1WB)     | 0.85            | 2.09              | 133         | 2.739(6)          | O(2W)#1  |
| O(2W)–H(2WD)     | 0.85            | 2.00              | 145         | 2.739(6)          | O(1W)#2  |
| <b>Complex 3</b> |                 |                   |             |                   |          |
| O(9)–H(9A)       | 0.85            | 1.92              | 175         | 2.762(7)          | O(14)#1  |
| O(9)–H(9B)       | 0.85            | 2.13              | 162         | 2.949(2)          | O(16)#2  |
| O(10)–H(10D)     | 0.85            | 2.12              | 133         | 2.766(8)          | O(15)#3  |
| O(11)–H(11D)     | 0.85            | 2.49              | 126         | 3.071(4)          | O(15)#3  |
| O(11)–H(11B)     | 0.85            | 1.81              | 152         | 2.588(0)          | O(3)#2   |
| O(12)–H(12C)     | 0.85            | 2.28              | 149         | 3.046(5)          | O(13)#3  |
| O(13)–H(13D)     | 0.85            | 2.47              | 125         | 3.046(5)          | O(12)#3  |
| O(14)–H(14A)     | 0.85            | 2.36              | 112         | 2.762(7)          | O(9)#4   |
| O(14)–H(14C)     | 0.85            | 2.44              | 119         | 2.944(9)          | O(10)#3  |
| O(15)–H(15A)     | 0.85            | 2.33              | 115         | 2.802(9)          | O(5)#5   |
| O(15)–H(15A)     | 0.85            | 2.36              | 161         | 3.178(5)          | O(4)#3   |
| O(16)–H(16B)     | 0.85            | 2.42              | 121         | 2.949(2)          | O(9)#6   |

<sup>c</sup> Symmetry codes: (1) #1  $x, -y + 1/2, z - 1/2$ ; #2  $-x + 1, y + 1/2, -z + 1/2$ ; #3  $x, y + 3/2, z + 1/2$ ; #4  $x, y + 1, z$ ; #5  $-x + 1, -y + 1, -z + 1$ ; #6  $x, -y + 3/2, z + 1/2$ ; (2) #1  $-x + 1, -y + 1, -z + 1$ ; #2  $-x + 1, -y + 1, -z + 1$ ; (3) #1  $-x + 1/2, y - 1/2, -z + 1/2$ ; #2  $x - 1/2, -y + 1/2, z - 1/2$ ; #3  $-x + 1, -y + 1, -z + 1$ ; #4  $-x + 1/2, y + 1/2, -z + 1/2$ ; #5  $-x + 3/2, y + 1/2, -z + 3/2$ ; #6  $x + 1/2, -y + 1/2, z + 1/2$ .

**Table S2.** Selected Bond angles ( $^{\circ}$ ) and Dihedral angles ( $^{\circ}$ ) of the bix ligands and their tendencies in Complexes 1-3.

| Complexes                         |                                      | 3        | 1          | 2        |
|-----------------------------------|--------------------------------------|----------|------------|----------|
| Dihedral angles<br>( $^{\circ}$ ) | phenyl ring and<br>imidazole ring    | 65.1(6)  | 75.3(2)    | 80.6(4)  |
|                                   | imidazole ring and<br>imidazole ring | 64.7(4)  | 67.8(9)    | 79.0(1)  |
|                                   | imidazole ring and<br>imidazole ring | 53.4(3)  | 56.7(5)    | 60.0(4)  |
|                                   |                                      |          |            |          |
| Bond angles<br>( $^{\circ}$ )     | <1                                   | 114.6(4) | 112.3(2)   | 111.5(3) |
|                                   | <2                                   | 114.0(4) | 112.22(18) | 115.5(3) |

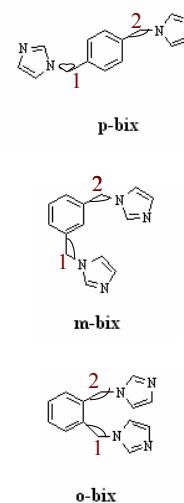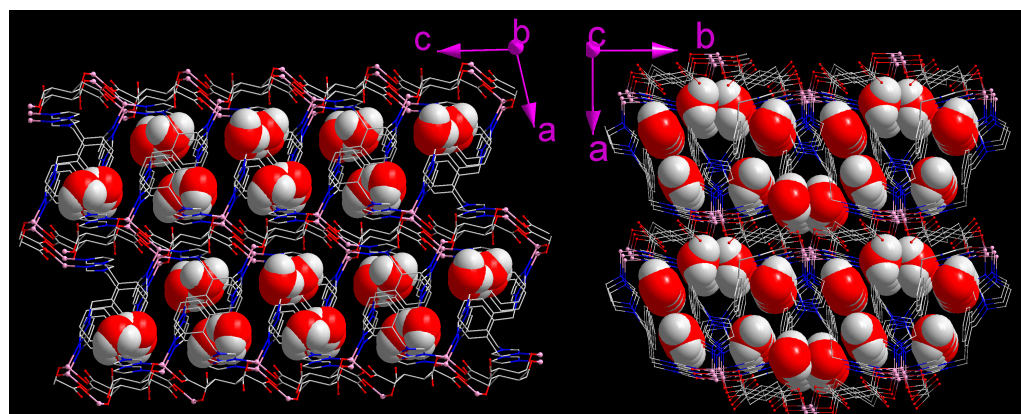

**Fig. S1.** Perspective view of 1 along different directions showing the cavities encapsulating free water molecules. Interestingly, three kinds of rectangle cavities have been found and their dimensions looking down the *c*- and *b*-axis are approximately  $6.26 \times 8.64 \text{ \AA}$ ,  $7.47 \times 6.76 \text{ \AA}$  and  $7.20 \times 11.35 \text{ \AA}$ , respectively.

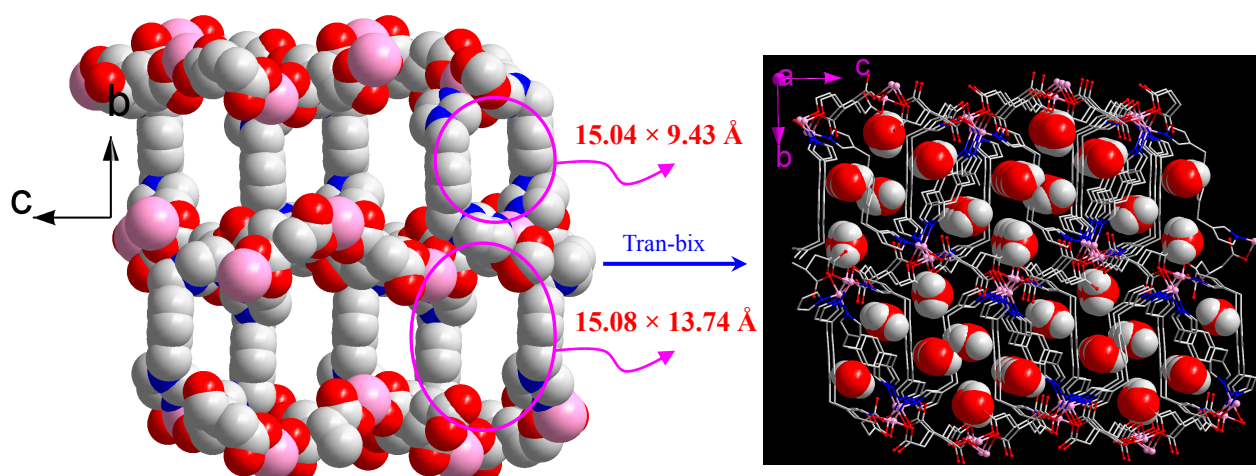

**Fig. S2.** The space-filling model of 3 with tran-bix omitted along the [100] direction (two kinds of channels being about  $15.08 \times 13.74 \text{ \AA}$  and  $15.04 \times 9.43 \text{ \AA}$  were found if the *trans*-bix pillars were

omitted. In fact, it is *trans*-bix that make the cavities of framework **3** smaller and complicated).

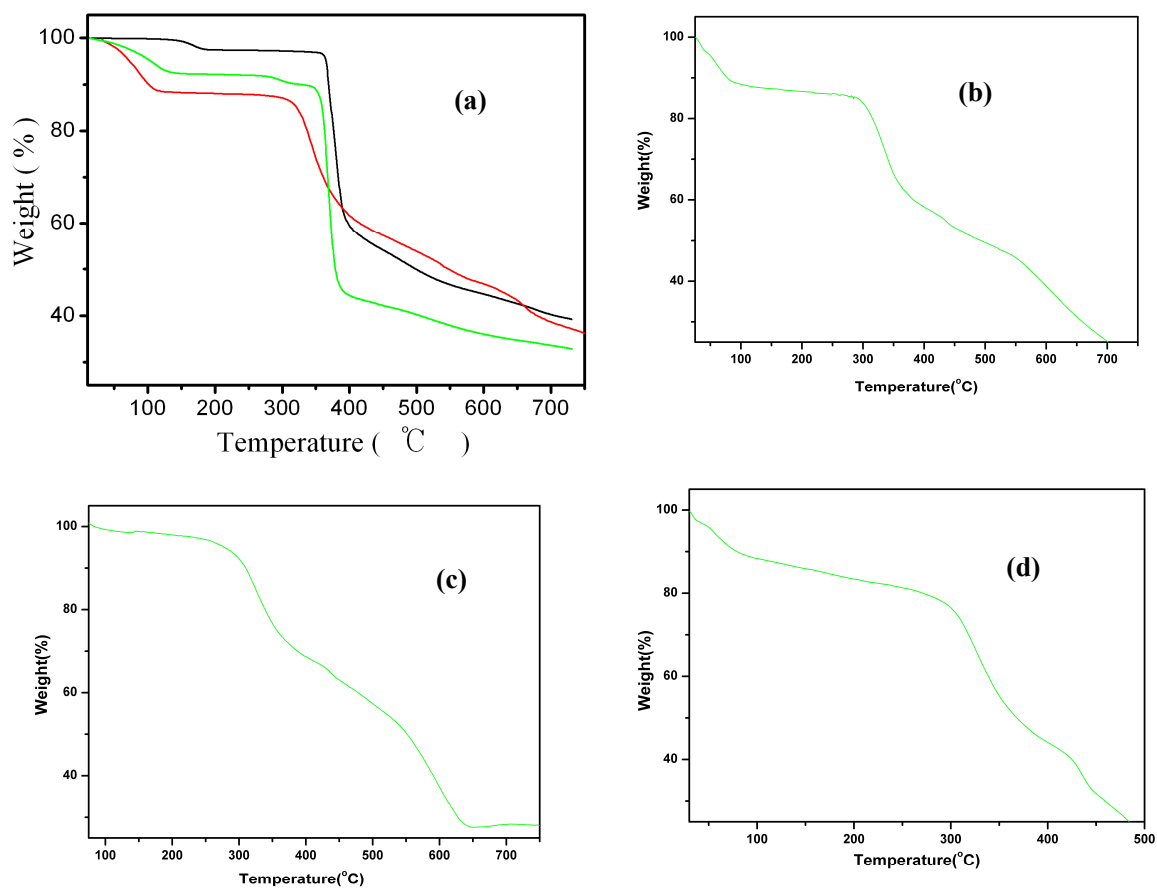

**Fig. S3.** (a) TG curves of compounds **1** (red), **2** (black) and **3** (green); TG curves of dehydrated compounds **3** with other solvent molecules: (b) methanol; (c) acetonitrile; (d) chloroform.

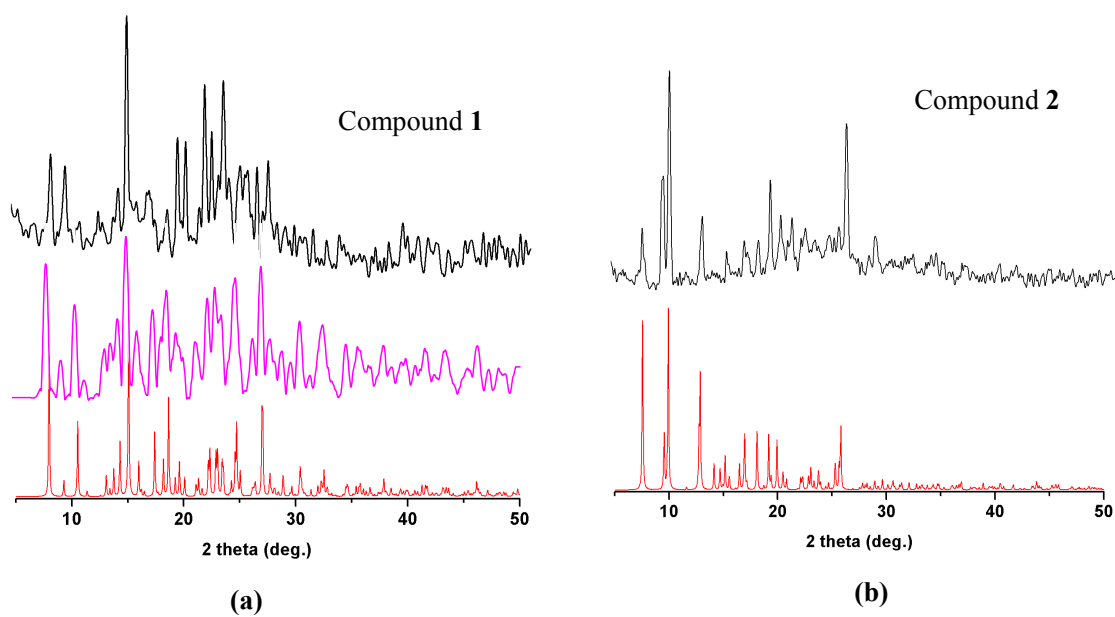

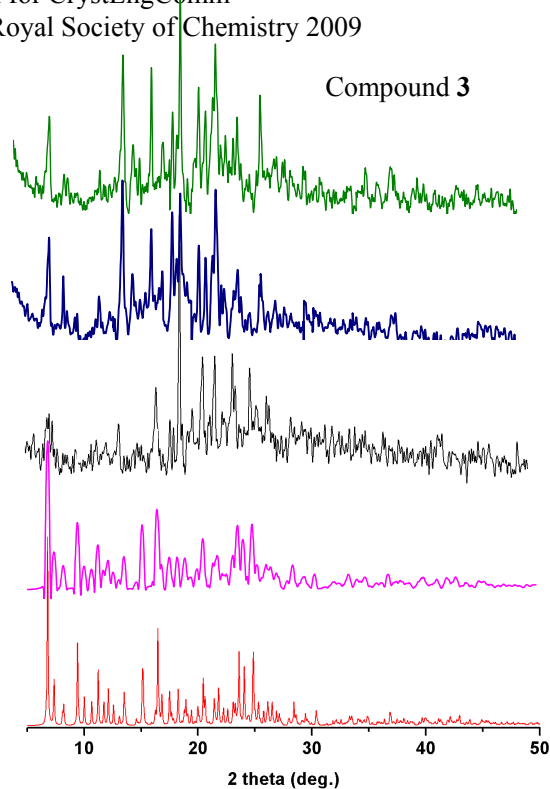

(c)

**Fig. S4** The PXRD for **1** (a), **2** (b) and **3** (c). red: simulated; magenta: taken at room temperature; black: after heating to 150°C under vacuum for 5h.; royal: adsorbed methanol; olive: adsorbed chloroform.

\* For **3** with adsorbed methanol and chloroform, the powder XRD patterns show some differences from structures of **3** without adsorbed methanol and chloroform (S4c). That, probably, comes from the flexible ligands.

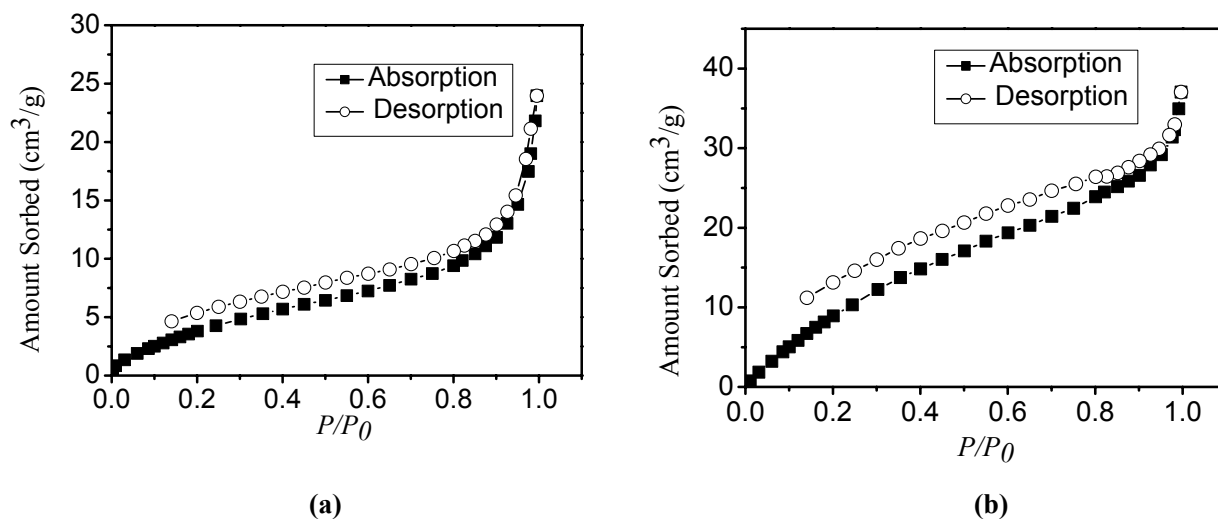

(a)

(b)

**Fig. S5.** Adsorption/desorption isotherm of nitrogen gas (77 K) for **1** (a) and **3** (b).

\* Compounds **1** and **2** both show type II physisorption isotherms
